# Supplementary material
Source: HighWire-hosted journal article supplement (http://www.qdcxjkg.com/highwire/filestream/113745/field_highwire_adjunct_files/0/ERJ-02264-2011_Disclosures.pdf)
Supplement: ERJ-02264-2011_Disclosures.pdf [file ERJ-02264-2011_Disclosures.pdf]

**G-C. Funk** received a fee for speaking at a clinical course on non-invasive ventilation organised by Dräger Medical in 2010.
